# Supplementary material for: Narrowband TADF emitters with high utilization of triplet excitons: theoretical insights and molecular design
Source: Royal Society of Chemistry journal article supplement (doi:10.1039/d3cp05439j), 2024-01-01
Supplement: d3cp05439j1.pdf [file d3cp05439j1.pdf]

## Electronic Supplementary Information for

### **Narrowband TADF emitters with high utilization of triplet excitons: theoretical insight and molecular design**

Qing Zhang,<sup>a</sup> Tao Liu,<sup>a</sup> Zhouyang Shi,<sup>b</sup> Zhong Zheng,<sup>c</sup> Chunyan Lv,<sup>\*a</sup> Xin Wang,<sup>\*d</sup>  
Yujian Zhang<sup>\*c</sup>

<sup>[a]</sup>Department of Materials Chemistry, Huzhou University, East 2nd Ring Rd. No. 759, Huzhou, 313000, People's Republic of China, E-mail: lcy@zjhu.edu.cn

<sup>[b]</sup>Zhejiang Jiuhe Geological and Ecological Environment Planning and Design Co., LTD, Huzhou, 313002, People's Republic of China

<sup>[c]</sup>Anji Branch of Huzhou Ecological Environment Bureau, Huzhou, 313300, People's Republic of China

<sup>[d]</sup>Henan-Macquarie University Joint Centre for Biomedical Innovation, Henan Key Laboratory of Brain Targeted Bio-nanomedicine, School of Life Sciences, Henan University, Kaifeng, Henan, 475004, People's Republic of China, E-mail: wx@henu.edu.cn

<sup>[e]</sup>Key Laboratory of the Ministry of Education for Advanced Catalysis Materials, Department of Chemistry, Zhejiang Normal University, Yingbin Road No. 688, Jinhua 321004, People's Republic of China, sciencezyj@foxmail.com

## 1. Definition of MPP and SDP

The molecular planarity parameter (MPP) and span of deviation from plane (SDP) are two reliable metrics to evaluate the planarity of the whole molecule. For a given molecule with  $N$  atoms, the MPP can be defined as the root-mean-square of deviation of atoms from the fitting plane

$$MPP = \sqrt{\frac{1}{N} \sum_i d_i^2}$$

where  $d_i$  is the distance between the atom  $i$  and the fitting plane. The signed distance between the atom  $i$  and the fitting plane can be evaluated as

$$d_i^s = \frac{Ax_i + By_i + Cz_i + D}{\sqrt{A^2 + B^2 + C^2}}$$

where  $A, B, C, D$  are parameters of the fitting plane. Following that, the SDP can be simply calculated as

$$SDP = d_{\max}^s - d_{\min}^s$$

in which the  $d_{\max}^s$  and  $d_{\min}^s$  are the most positive and the most negative  $d^s$  values among all the considered atoms, respectively.

## 2. Definition of $D$ -index and $S_r$ -index

The charge transfer length in the X/Y/Z direction can be calculated by evaluating the distance between centroid of hole and electron in the corresponding directions:

$$D_x = |X_{\text{ele}} - X_{\text{hole}}|, D_y = |Y_{\text{ele}} - Y_{\text{hole}}|, D_z = |Z_{\text{ele}} - Z_{\text{hole}}|$$

Based on the abovementioned definitions, the total magnitude of the charge transfer length can be defined as  $D$ -index:

$$D\text{-index} = \sqrt{(D_x)^2 + (D_y)^2 + (D_z)^2}$$

The overlap function between the hole and electron distribution can be defined as

$$S_r(r) = \sqrt{\rho^{\text{hole}}(r)\rho^{\text{ele}}(r)}$$

where  $\rho^{\text{hole}}$  and  $\rho^{\text{ele}}$  are the density distribution of hole and electron, respectively. The  $S_r$ -index refers to the overlapping extent of the hole and electron, and it can be defined as the integral of the  $S_r$  function:

$$S_r - \text{index} = \int S_r(r) dr = \sqrt{\rho^{\text{hole}}(r)\rho^{\text{ele}}(r)}$$

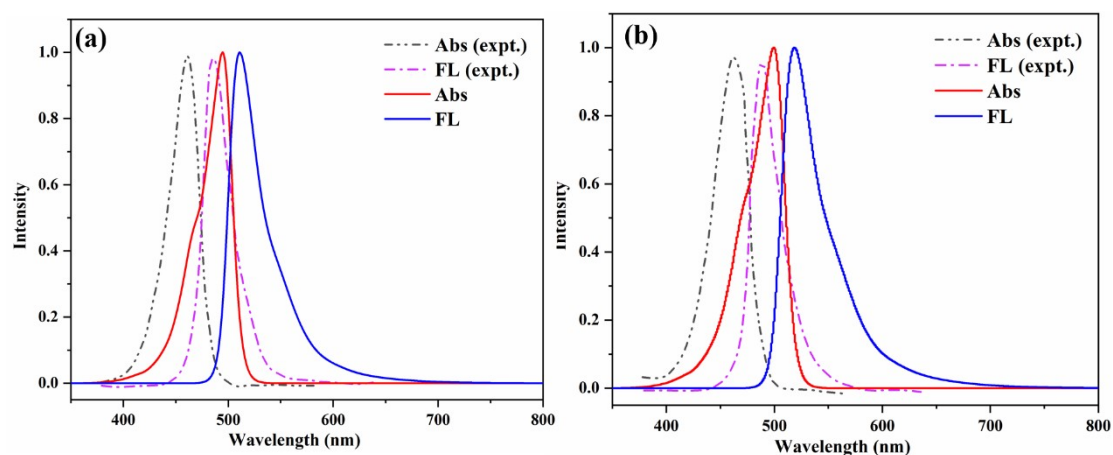

**Fig. S1** B3LYP-simulated absorption (Abs) and the normalized vibrational resolved fluorescence spectrum (FL) of **BN-DMAC** and **BN-DPAC**, together with their corresponding curves measured in the experiment.<sup>16</sup>

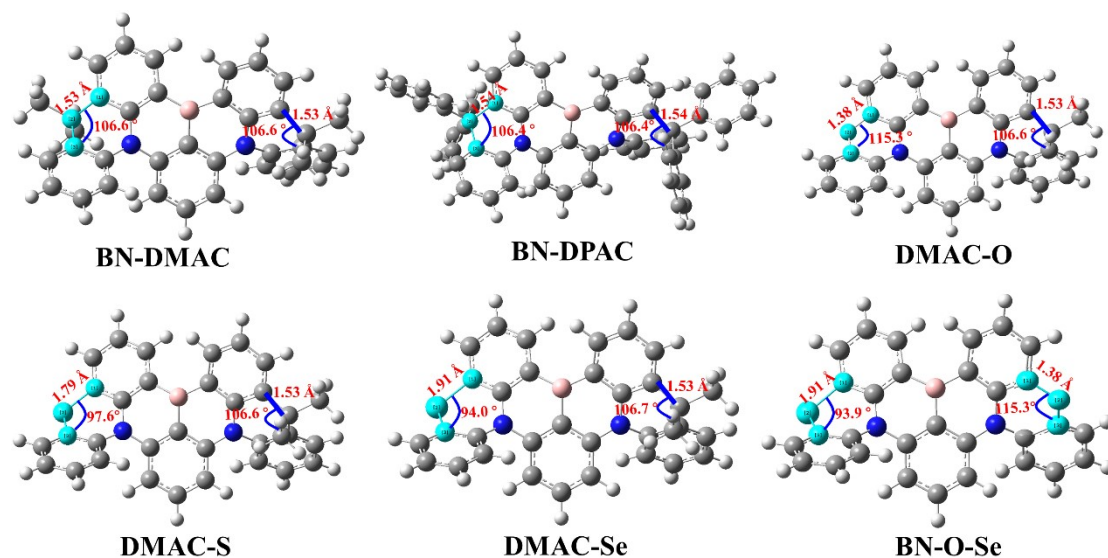

**Fig. S2** B3LYP-optimized structures for all studied MR-TADF emitters, together with the bond lengths and angle degrees between the  $sp^3$ -inserted C and its neighboring C atoms.

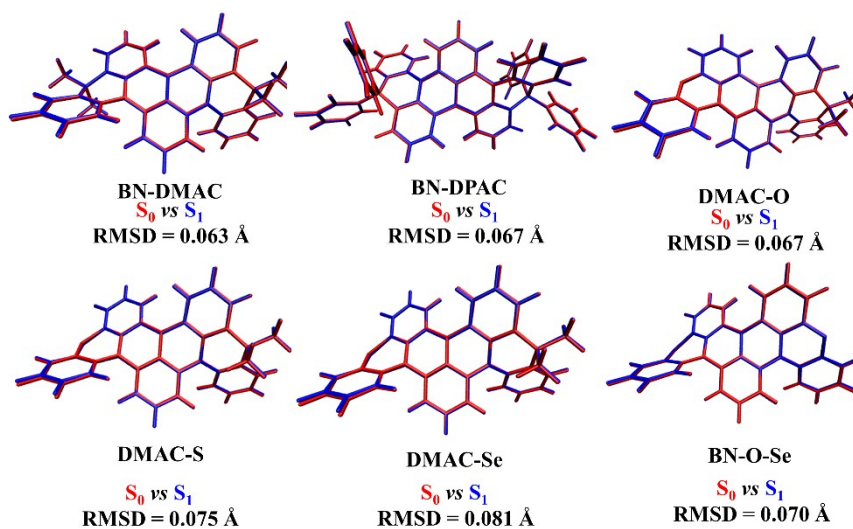

**Fig. S3.** Geometry comparison and RMSD values for the  $S_0$  (red) vs  $S_1$  (blue) of all the considered systems here.

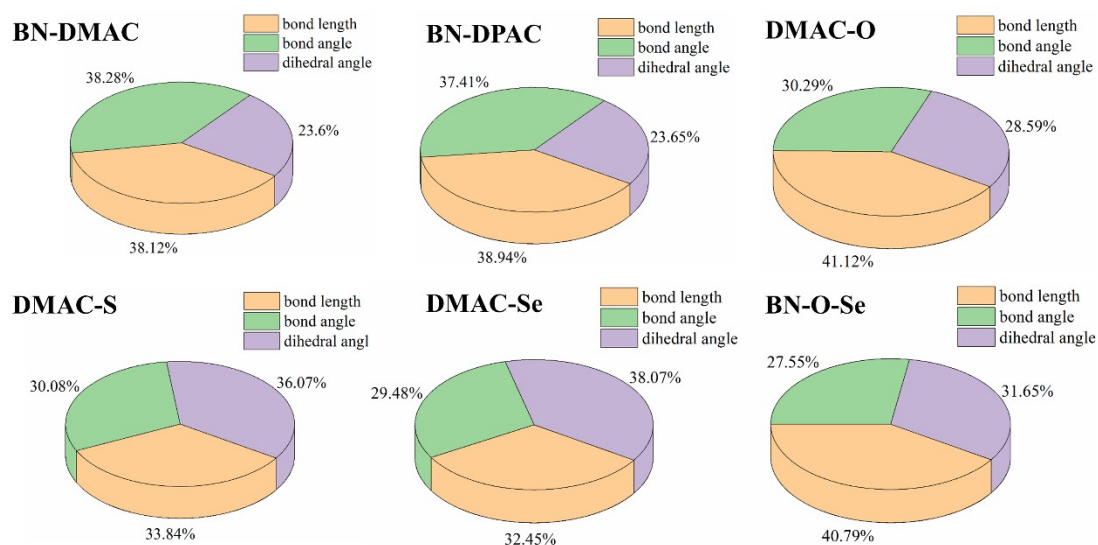

**Fig. S4.** Contributions of bond lengths, bond angles, and dihedral angles to the reorganization energy between  $S_0$  and  $S_1$  at  $S_1$ -optimized geometries for all studied systems.

**Table S1.** Emission energies of  $S_1$  and  $T_1$ , the maximum wavelength of fluorescence ( $\lambda_{\text{emi}}$ ), and  $S_1$ - $T_1$  energy gaps ( $\Delta E_{\text{ST}}$ ) simulated by combining B3LYP, BMK, and PBE0 functionals with 6-31G(d, p) basis sets, respectively, as well as the  $\lambda$  and  $\Delta E_{\text{ST}}$  values measured in the experiment.<sup>16</sup>

|                |       | $S_1$ (eV) | $\lambda_{\text{emi}}$ (nm) | $T_1$ (eV) | $\Delta E_{\text{ST}}$ (eV) |
|----------------|-------|------------|-----------------------------|------------|-----------------------------|
| <b>BN-DMAC</b> | B3LYP | 2.62       | 474                         | 2.28       | 0.33                        |
|                | BMK   | 2.94       | 421                         | 2.51       | 0.43                        |
|                | PBE0  | 2.73       | 455                         | 2.35       | 0.38                        |
|                | Expt. | 2.56       | 485                         | -          | 0.14                        |
| <b>BN-DPAC</b> | B3LYP | 2.59       | 480                         | 2.27       | 0.32                        |
|                | BMK   | 2.91       | 425                         | 2.50       | 0.41                        |
|                | PBE0  | 2.69       | 461                         | 2.33       | 0.36                        |
|                | Expt. | 2.53       | 490                         | -          | 0.11                        |

**Table S2.** B3LYP-predicted vertical excitation energies ( $\Delta E_{\text{emi}}$ , eV), maximum wavelengths of the fluorescence ( $\lambda_{\text{emi}}$ , nm), transition dipole moments ( $\mu$ , Debye) and oscillator strengths ( $f$ ) for the  $S_1 \rightarrow S_0$  transitions of all systems considered here.

|                         | <b>BN-DMAC</b> | <b>BN-DPAC</b> | <b>DMAC-O</b> | <b>DMAC-S</b> | <b>DMAC-Se</b> | <b>BN-O-Se</b> |
|-------------------------|----------------|----------------|---------------|---------------|----------------|----------------|
| $\Delta E_{\text{emi}}$ | 2.62           | 2.59           | 2.52          | 2.53          | 2.53           | 2.46           |
| $\lambda_{\text{emi}}$  | 474            | 480            | 492           | 490           | 489            | 504            |
| $f$                     | 0.328          | 0.349          | 0.275         | 0.275         | 0.268          | 0.245          |
| $\mu$                   | 5.75           | 5.97           | 5.37          | 5.35          | 5.28           | 5.13           |
| $\lambda_{\text{expt}}$ | 485            | 490            |               |               |                |                |

**Table S3.** Calculated vertical excitation energies of  $S_1$  ( $\Delta E_{S1}$ , eV) and  $T_1$  ( $\Delta E_{T1}$ , eV), fluorescence peaks ( $\lambda_{\text{emi}}$ , nm), and energy gaps between  $S_1$  and  $T_1$  ( $\Delta E_{ST}$ , eV) by the wavefunction-based STEOM-DLPNO-CCSD/def2-SVP calculations, together with the fluorescence peaks ( $\lambda_{\text{expt}}$ , nm) and energy gaps between  $S_1$  and  $T_1$  ( $\Delta E_{\text{expt}}$ , eV) measured in the experiment.<sup>16</sup>

|                             | BN-DMAC | BN-DPAC | DMAC-O | DMAC-S | DMAC-Se | BN-O-Se |
|-----------------------------|---------|---------|--------|--------|---------|---------|
| $S_1$ (eV)                  | 2.571   | 2.544   | 2.543  | 2.527  | 2.561   | 2.503   |
| $\lambda_{\text{emi}}$ (nm) | 483     | 488     | 488    | 491    | 484     | 496     |
| $T_1$ (eV)                  | 2.448   | 2.425   | 2.376  | 2.395  | 2.407   | 2.343   |
| $\Delta E_{ST}$             | 0.123   | 0.119   | 0.167  | 0.132  | 0.154   | 0.160   |
| $\lambda_{\text{expt}}$     | 485     | 490     |        |        |         |         |
| $\Delta E_{\text{expt}}$    | 0.14    | 0.11    |        |        |         |         |

**Table S4.** Total reorganization energy and the corresponding contributions of bond lengths, bond angles, and dihedral angles of all the studied molecules, where the energy is in meV.

|         | Bond length | Bond angle | Dihedral angle | Total |
|---------|-------------|------------|----------------|-------|
| BN-DMAC | 38.2        | 38.3       | 23.6           | 100.1 |
| BN-DPAC | 39.8        | 38.2       | 24.2           | 102.2 |
| DMAC-O  | 48.7        | 35.8       | 33.8           | 118.4 |
| DMAC-S  | 40.8        | 36.3       | 43.5           | 120.6 |
| DMAC-Se | 40.0        | 36.3       | 47.0           | 123.4 |
| BN-O-Se | 53.3        | 36.0       | 41.4           | 130.7 |

**Table S5:** Cartesian coordinates of the (TD) B3LYP-optimized  $S_0$ ,  $S_1$ , and  $T_1$  structures for all the studied MR-TADF emitters.

|           |                    |             |             | MR-TADF               |             |             |             |
|-----------|--------------------|-------------|-------------|-----------------------|-------------|-------------|-------------|
|           |                    |             |             | emitters.             |             |             |             |
| <hr/>     |                    |             |             | H                     | 6.78120500  | -2.13968400 | -2.60899400 |
| <b>BN</b> | <b>DMAC_</b> $S_0$ |             |             | C                     | 3.85727300  | 2.68890900  | 1.20594100  |
| N         | 2.43340400         | -0.46220800 | -0.06385900 | H                     | 4.80932000  | 3.08286600  | 1.54290700  |
| N         | -2.43339300        | -0.46234900 | 0.06357700  | C                     | -4.91182400 | 0.34838700  | -0.96281200 |
| C         | -1.22250100        | -1.18217300 | 0.03914900  | C                     | 4.66148600  | -0.52090600 | 2.23094300  |
| C         | 1.21913000         | -2.58465700 | -0.02022400 | H                     | 4.65723200  | 0.11041200  | 3.12541100  |
| H         | 2.14767100         | -3.14171600 | -0.01374600 | H                     | 5.45488200  | -1.26826900 | 2.33638100  |
| C         | -1.50623800        | 3.03574300  | -0.82023400 | H                     | 3.70416300  | -1.04447100 | 2.17921200  |
| H         | -0.63256400        | 3.67708100  | -0.87267200 | C                     | 4.91161800  | 0.34844100  | 0.96316900  |
| C         | 3.76009000         | 1.35274700  | 0.82344400  | C                     | 5.99194000  | -0.98341400 | -0.97337300 |
| C         | 3.59488300         | -0.96876000 | -0.72515500 | H                     | 6.97626800  | -0.67043800 | -0.64515400 |
| C         | 0.00001200         | -0.46337600 | -0.00014300 | C                     | -5.88527200 | -1.81232000 | 2.09031800  |
| C         | 1.34784600         | 1.70434800  | 0.38125700  | H                     | -6.78057800 | -2.13991800 | 2.60967600  |
| C         | -3.59469300        | -0.96897500 | 0.72508400  | C                     | -4.62392800 | -2.20280700 | 2.53876600  |
| C         | 3.48276900         | -1.77155100 | -1.86928200 | H                     | -4.52167000 | -2.82668000 | 3.42161700  |
| H         | 2.50258300         | -2.04744400 | -2.23880500 | C                     | -4.66202100 | -0.52088300 | -2.23073000 |
| C         | -2.50217800        | 0.87816000  | -0.38263600 | H                     | -4.65795000 | 0.11051500  | -3.12514100 |
| C         | 2.50209000         | 0.87828200  | 0.38245200  | H                     | -5.45548600 | -1.26818700 | -2.33602800 |
| C         | -3.76027800        | 1.35264300  | -0.82332900 | H                     | -3.70471400 | -1.04450300 | -2.17927500 |
| C         | 1.22260000         | -1.18209800 | -0.03956000 | C                     | 6.27539100  | 1.03891400  | 1.12569600  |
| C         | 4.86035200         | -0.55163700 | -0.27261500 | H                     | 6.51840200  | 1.67546400  | 0.26953900  |
| C         | 2.74036800         | 3.53328300  | 1.20709900  | H                     | 7.07050700  | 0.29772700  | 1.24142500  |
| H         | 2.84322200         | 4.56354300  | 1.53441900  | H                     | 6.29058800  | 1.65425400  | 2.02888500  |
| C         | -3.48232300        | -1.77193700 | 1.86905400  | C                     | -6.27555200 | 1.03903600  | -1.12500300 |
| H         | -2.50206000        | -2.04796000 | 2.23827300  | H                     | -6.51840000 | 1.67543100  | -0.26867900 |
| C         | -4.86029200        | -0.55176600 | 0.27290900  | H                     | -7.07075700 | 0.29795300  | -1.24079700 |
| C         | 0.00006800         | -3.25878100 | -0.00041700 | H                     | -6.29077500 | 1.65459000  | -2.02804800 |
| H         | 0.00012100         | -4.34513200 | -0.00053600 | B                     | -0.00005100 | 1.05563600  | -0.00014900 |
| C         | -1.34796200        | 1.70427000  | -0.38157800 | <b>BN-DMAC_</b> $S_1$ |             |             |             |
| C         | 1.50601300         | 3.03582700  | 0.81993100  | N                     | 2.41582600  | -0.42755400 | -0.10012000 |
| H         | 0.63231400         | 3.67714400  | 0.87220600  | N                     | -2.41582600 | -0.42755400 | 0.10011900  |
| C         | -3.85757500        | 2.68880100  | -1.20577600 | C                     | -1.20267900 | -1.13883100 | 0.06147900  |
| H         | -4.80971500        | 3.08273100  | -1.54252400 | C                     | 1.20952800  | -2.55432800 | -0.01175800 |
| C         | -5.99169800        | -0.98352200 | 0.97395100  | H                     | 2.14691300  | -3.09610100 | 0.02279900  |
| H         | -6.97610600        | -0.67043200 | 0.64607100  | C                     | -1.55922200 | 3.08981400  | -0.78618900 |
| C         | 4.62452700         | -2.20240300 | -2.53873600 | H                     | -0.71056900 | 3.76538900  | -0.81175100 |
| H         | 4.52249700         | -2.82614800 | -3.42170000 | C                     | 3.76958800  | 1.34857200  | 0.83816900  |
| C         | -2.74067800        | 3.53318200  | -1.20717600 | C                     | 3.55412000  | -0.95604300 | -0.74702500 |
| H         | -2.84361400        | 4.56344200  | -1.53447400 | C                     | 0.00000000  | -0.41241300 | 0.00000000  |
| C         | -1.21902200        | -2.58472200 | 0.01952500  | C                     | 1.35263300  | 1.75239400  | 0.37100700  |
| H         | -2.14757200        | -3.14176900 | 0.01295700  | C                     | -3.55411900 | -0.95604300 | 0.74702500  |
| C         | 5.88577400         | -1.81206500 | -2.08986000 | C                     | 3.42158000  | -1.77714100 | -1.88331500 |

|   |             |             |             |                   |             |             |             |
|---|-------------|-------------|-------------|-------------------|-------------|-------------|-------------|
| H | 2.43385900  | -2.01001700 | -2.26287500 | H                 | -5.45268000 | -1.31310100 | -2.30124100 |
| C | -2.51064700 | 0.91513700  | -0.39499000 | H                 | -3.70173500 | -1.06651600 | -2.16734400 |
| C | 2.51064700  | 0.91513800  | 0.39498900  | C                 | 6.28504500  | 0.99402700  | 1.09754900  |
| C | -3.76958900 | 1.34857200  | -0.83816800 | H                 | 6.52607100  | 1.63201500  | 0.24212000  |
| C | 1.20267900  | -1.13883100 | -0.06148100 | H                 | 7.07103900  | 0.24121500  | 1.20112100  |
| C | 4.83330800  | -0.56356900 | -0.29264100 | H                 | 6.31747100  | 1.60461800  | 2.00301300  |
| C | 2.80736400  | 3.55292000  | 1.18685200  | C                 | -6.28504600 | 0.99402800  | -1.09754400 |
| H | 2.92942100  | 4.58957300  | 1.49013100  | H                 | -6.52607100 | 1.63201600  | -0.24211500 |
| C | -3.42157900 | -1.77714300 | 1.88331400  | H                 | -7.07104000 | 0.24121700  | -1.20111500 |
| H | -2.43385700 | -2.01001900 | 2.26287300  | H                 | -6.31747400 | 1.60462000  | -2.00300800 |
| C | -4.83330800 | -0.56356900 | 0.29264300  | B                 | 0.00000000  | 1.12110300  | 0.00000000  |
| C | 0.00000000  | -3.24850600 | -0.00000400 |                   |             |             |             |
| H | 0.00000000  | -4.33311800 | -0.00000500 | <b>BN-DMAC_T1</b> |             |             |             |
| C | -1.35263400 | 1.75239400  | -0.37100800 | N                 | 2.42188200  | -0.42480300 | -0.09944000 |
| C | 1.55922200  | 3.08981500  | 0.78618700  | N                 | -2.42188200 | -0.42480300 | 0.09943600  |
| H | 0.71057000  | 3.76539000  | 0.81174900  | C                 | -1.20569300 | -1.13658700 | 0.05468100  |
| C | -3.90752700 | 2.69254500  | -1.22300700 | C                 | 1.20938200  | -2.54636800 | -0.00344600 |
| H | -4.86651100 | 3.06926500  | -1.55616600 | H                 | 2.14706400  | -3.08840500 | 0.03080100  |
| C | -5.94939000 | -1.04052200 | 0.98406000  | C                 | -1.56421700 | 3.09198300  | -0.76792000 |
| H | -6.94280200 | -0.75563000 | 0.65814000  | H                 | -0.71559900 | 3.76734500  | -0.79599100 |
| C | 4.55121200  | -2.24804000 | -2.54134000 | C                 | 3.77872600  | 1.35444100  | 0.82280800  |
| H | 4.43743600  | -2.87500200 | -3.42023600 | C                 | 3.56395700  | -0.96166300 | -0.74220700 |
| C | -2.80736400 | 3.55292000  | -1.18685300 | C                 | 0.00000000  | -0.39996000 | -0.00000300 |
| H | -2.92942000 | 4.58957200  | -1.49013300 | C                 | 1.35603900  | 1.75298700  | 0.35920100  |
| C | -1.20952800 | -2.55432800 | 0.01175200  | C                 | -3.56395200 | -0.96166500 | 0.74220700  |
| H | -2.14691300 | -3.09610000 | -0.02280700 | C                 | 3.43055200  | -1.78334400 | -1.87581700 |
| C | 5.82111700  | -1.88315500 | -2.09058700 | H                 | 2.44283800  | -2.01623000 | -2.25499900 |
| H | 6.70894100  | -2.23837800 | -2.60440400 | C                 | -2.51649500 | 0.91574900  | -0.38222700 |
| C | 3.90752700  | 2.69254500  | 1.22300700  | C                 | 2.51649400  | 0.91575000  | 0.38222200  |
| H | 4.86651100  | 3.06926500  | 1.55616700  | C                 | -3.77872900 | 1.35444200  | -0.82280700 |
| C | -4.90797200 | 0.32580200  | -0.94814000 | C                 | 1.20569500  | -1.13658700 | -0.05469000 |
| C | 4.66664600  | -0.55568600 | 2.21104000  | C                 | 4.84124100  | -0.57222700 | -0.28538600 |
| H | 4.67914400  | 0.06874500  | 3.10985500  | C                 | 2.81148100  | 3.55666300  | 1.16130200  |
| H | 5.45267600  | -1.31310200 | 2.30124300  | H                 | 2.93392200  | 4.59426600  | 1.46110000  |
| H | 3.70173200  | -1.06651500 | 2.16734600  | C                 | -3.43054200 | -1.78335100 | 1.87581300  |
| C | 4.90797000  | 0.32580100  | 0.94814200  | H                 | -2.44282700 | -2.01624000 | 2.25498900  |
| C | 5.94939100  | -1.04052200 | -0.98405700 | C                 | -4.84123900 | -0.57222600 | 0.28539500  |
| H | 6.94280300  | -0.75563000 | -0.65813600 | C                 | 0.00000000  | -3.24601700 | -0.00001400 |
| C | -5.82111500 | -1.88315700 | 2.09058800  | H                 | 0.00000000  | -4.33008100 | -0.00001900 |
| H | -6.70893900 | -2.23838000 | 2.60440600  | C                 | -1.35603900 | 1.75298600  | -0.35920900 |
| C | -4.55121000 | -2.24804200 | 2.54134000  | C                 | 1.56421700  | 3.09198600  | 0.76791000  |
| H | -4.43743300 | -2.87500600 | 3.42023500  | H                 | 0.71559900  | 3.76734800  | 0.79597800  |
| C | -4.66664900 | -0.55568600 | -2.21103800 | C                 | -3.91548900 | 2.69609800  | -1.19872400 |
| H | -4.67914700 | 0.06874600  | -3.10985300 | H                 | -4.87317300 | 3.07617000  | -1.53172900 |
|   |             |             |             | C                 | -5.95879800 | -1.05690700 | 0.97001800  |



|                              |             |             |             |   |             |             |             |
|------------------------------|-------------|-------------|-------------|---|-------------|-------------|-------------|
| H                            | -6.95203600 | -0.77463100 | 0.64140500  | C | 8.76157200  | 2.42913000  | -0.67467400 |
| C                            | 4.56084500  | -2.26022100 | -2.52969400 | H | 9.68682900  | 2.96932900  | -0.85241500 |
| H                            | 4.44713000  | -2.88918400 | -3.40711800 | C | 8.62817600  | 1.60621200  | 0.44055200  |
| C                            | -2.81148200 | 3.55666100  | -1.16130800 | H | 9.45079600  | 1.49920100  | 1.14184900  |
| H                            | -2.93392300 | 4.59426400  | -1.46110600 | C | 7.43588300  | 0.91028500  | 0.67005100  |
| C                            | -1.20938200 | -2.54636800 | 0.00342500  | H | 7.35546500  | 0.27641700  | 1.54491100  |
| H                            | -2.14706500 | -3.08840300 | -0.03082600 | C | 5.01783600  | 0.27589600  | -0.00209300 |
| C                            | 5.83054100  | -1.90151400 | -2.07450600 | C | 5.05412400  | -0.58503300 | 1.29709300  |
| H                            | 6.71856300  | -2.26305000 | -2.58355600 | C | 5.53381600  | -1.90263700 | 1.27129800  |
| C                            | 3.91548600  | 2.69609800  | 1.19872500  | H | 5.84405100  | -2.34379400 | 0.33045800  |
| H                            | 4.87316900  | 3.07616800  | 1.53173500  | C | 5.61743800  | -2.66208400 | 2.43944900  |
| C                            | -4.91457700 | 0.32998600  | -0.94633700 | H | 5.99011500  | -3.68133800 | 2.38942700  |
| C                            | 4.66655100  | -0.53698400 | 2.21758500  | C | 5.22165100  | -2.11939700 | 3.66222600  |
| H                            | 4.67892000  | 0.09657600  | 3.10997900  | H | 5.28104300  | -2.71094800 | 4.57112900  |
| H                            | 5.45010900  | -1.29559300 | 2.31740100  | C | 4.74652100  | -0.80845000 | 3.70284600  |
| H                            | 3.70040000  | -1.04563000 | 2.17692500  | H | 4.43288900  | -0.37056600 | 4.64625800  |
| C                            | 4.91457200  | 0.32998400  | 0.94634800  | C | 4.66475400  | -0.05062600 | 2.53331400  |
| C                            | 5.95880300  | -1.05690600 | -0.97000500 | H | 4.28901200  | 0.96492000  | 2.58702300  |
| H                            | 6.95204000  | -0.77463200 | -0.64138700 | C | 4.71668100  | -0.63895100 | -1.20108800 |
| C                            | -5.83053100 | -1.90152000 | 2.07451400  | C | 5.69754600  | -1.10603800 | -2.08395500 |
| H                            | -6.71855000 | -2.26305800 | 2.58356700  | H | 6.72719700  | -0.80260600 | -1.93467900 |
| C                            | -4.56083300 | -2.26023000 | 2.52969400  | C | 5.37768900  | -1.95100100 | -3.14530100 |
| H                            | -4.44711400 | -2.88919800 | 3.40711400  | H | 6.15929000  | -2.30668800 | -3.80934200 |
| C                            | -4.66656900 | -0.53698300 | -2.21757700 | C | 4.04860800  | -2.32128900 | -3.35145900 |
| H                            | -4.67895700 | 0.09657500  | -3.10997200 | H | 3.77635000  | -2.95287000 | -4.19172500 |
| H                            | -5.45012200 | -1.29559900 | -2.31737900 | C | 3.05656700  | -1.86521200 | -2.48911300 |
| H                            | -3.70041200 | -1.04562000 | -2.17693100 | H | 2.02182500  | -2.13265200 | -2.66510300 |
| C                            | 6.29238300  | 0.99706700  | 1.09285100  | C | 3.38702400  | -1.05209000 | -1.39450800 |
| H                            | 6.53674000  | 1.62628100  | 0.23191500  | C | 2.52965700  | 0.79228100  | -0.10207300 |
| H                            | 7.07652400  | 0.24370200  | 1.20541400  | C | 3.84517800  | 1.27358400  | 0.08812200  |
| H                            | 6.32407300  | 1.61608100  | 1.99259400  | C | 4.01062900  | 2.60088300  | 0.48065100  |
| C                            | -6.29239000 | 0.99706900  | -1.09282700 | H | 5.01232500  | 2.98092000  | 0.64541300  |
| H                            | -6.53672800 | 1.62630300  | -0.23189900 | C | 1.62894500  | 2.94226000  | 0.54233200  |
| H                            | -7.07653500 | 0.24370200  | -1.20535500 | H | 0.77809000  | 3.57908200  | 0.76193700  |
| H                            | -6.32409900 | 1.61606100  | -1.99258300 | C | 2.91293000  | 3.43866300  | 0.70778600  |
| B                            | 0.00000000  | 1.11760200  | -0.00000400 | H | 3.07356800  | 4.46155300  | 1.03453900  |
| <b>BN-DPAC_S<sub>0</sub></b> |             |             |             | C | 1.39501100  | 1.61654300  | 0.12301300  |
| N                            | -2.37711900 | -0.54602400 | 0.52422200  | C | -0.00001700 | -0.54950300 | -0.00003300 |
| N                            | 2.37707500  | -0.54597300 | -0.52430200 | C | 1.19345100  | -1.26744300 | -0.26671200 |
| C                            | 6.35532500  | 1.02406400  | -0.21081300 | C | 1.19508800  | -2.66907700 | -0.24242600 |
| C                            | 6.50493400  | 1.85927500  | -1.33312000 | H | 2.11053700  | -3.22525200 | -0.40005400 |
| H                            | 5.68013300  | 1.96531900  | -2.03096600 | C | -0.00000200 | -3.34305300 | -0.00003300 |
| C                            | 7.68985900  | 2.55291100  | -1.56391900 | H | 0.00000400  | -4.42934200 | -0.00003700 |
| H                            | 7.77685700  | 3.19092000  | -2.43876900 | C | -1.19348900 | -1.26745500 | 0.26661100  |

|   |             |             |             |                              |             |             |             |
|---|-------------|-------------|-------------|------------------------------|-------------|-------------|-------------|
| C | -1.19510100 | -2.66909400 | 0.24232900  | B                            | -0.00001800 | 0.96809500  | 0.00002000  |
| H | -2.11054300 | -3.22527100 | 0.39999800  | <b>BN-DPAC_S<sub>1</sub></b> |             |             |             |
| C | -2.52969200 | 0.79228200  | 0.10216200  | N                            | -2.35210200 | 0.48867100  | -0.55238200 |
| C | -1.39505700 | 1.61656300  | -0.12284500 | N                            | 2.35211000  | 0.48864000  | 0.55244100  |
| C | -1.62898800 | 2.94235900  | -0.54194700 | C                            | 6.35926600  | -0.99316700 | 0.21325700  |
| H | -0.77811900 | 3.57919600  | -0.76147300 | C                            | 6.51069700  | -1.83366600 | 1.33119900  |
| C | -2.91297500 | 3.43878000  | -0.70730500 | H                            | 5.67778300  | -1.96387700 | 2.01515200  |
| H | -3.07364100 | 4.46170900  | -1.03391500 | C                            | 7.70729200  | -2.50317700 | 1.57307600  |
| C | -4.01067300 | 2.60095900  | -0.48028900 | H                            | 7.79603500  | -3.14679900 | 2.44363700  |
| H | -5.01236800 | 2.98102400  | -0.64498800 | C                            | 8.78762100  | -2.35014100 | 0.69890200  |
| C | -3.84521400 | 1.27361000  | -0.08794200 | H                            | 9.72164300  | -2.87220300 | 0.88498400  |
| C | -4.71672000 | -0.63906300 | 1.20101600  | C                            | 8.65149600  | -1.52276600 | -0.41278100 |
| C | -3.38708100 | -1.05226000 | 1.39436900  | H                            | 9.48064200  | -1.39400200 | -1.10266600 |
| C | -3.05663200 | -1.86560300 | 2.48880500  | C                            | 7.44774000  | -0.85037400 | -0.65307700 |
| H | -2.02189900 | -2.13311800 | 2.66473100  | H                            | 7.36469300  | -0.21287300 | -1.52512900 |
| C | -4.04868600 | -2.32184900 | 3.35105900  | C                            | 5.00929400  | -0.27083100 | -0.00478000 |
| H | -3.77642600 | -2.95360000 | 4.19119400  | C                            | 5.04218600  | 0.60233600  | -1.29686800 |
| C | -5.37775900 | -1.95150600 | 3.14496600  | C                            | 5.50395200  | 1.92624700  | -1.26396600 |
| H | -6.15938500 | -2.30735300 | 3.80889500  | H                            | 5.81085600  | 2.36725600  | -0.32187200 |
| C | -5.69760000 | -1.10633500 | 2.08376800  | C                            | 5.57591900  | 2.69345800  | -2.42836200 |
| H | -6.72725400 | -0.80290200 | 1.93452800  | H                            | 5.93463900  | 3.71750700  | -2.37313700 |
| C | -5.01786200 | 0.27591000  | 0.00212700  | C                            | 5.18750400  | 2.15156600  | -3.65359200 |
| C | -6.35534400 | 1.02410100  | 0.21086100  | H                            | 5.23905400  | 2.74836100  | -4.55957600 |
| C | -6.50501900 | 1.85909700  | 1.33330400  | C                            | 4.73030100  | 0.83404400  | -3.70092600 |
| H | -5.68027800 | 1.96497600  | 2.03125100  | H                            | 4.42341100  | 0.39659400  | -4.64674400 |
| C | -7.68992400 | 2.55276800  | 1.56408700  | C                            | 4.65794900  | 0.06914000  | -2.53567300 |
| H | -7.77696600 | 3.19063400  | 2.43903700  | H                            | 4.29595700  | -0.95124600 | -2.59157700 |
| C | -8.76153200 | 2.42925500  | 0.67468000  | C                            | 4.68895100  | 0.63038200  | 1.19788600  |
| H | -9.68677400 | 2.96947500  | 0.85242300  | C                            | 5.65955100  | 1.13736700  | 2.06620500  |
| C | -8.62807300 | 1.60652700  | -0.44067500 | H                            | 6.69592200  | 0.85795600  | 1.91674500  |
| H | -9.45063600 | 1.49966000  | -1.14206300 | C                            | 5.32507200  | 1.99473800  | 3.11602800  |
| C | -7.43578500 | 0.91057400  | -0.67016400 | H                            | 6.10267300  | 2.37404400  | 3.77148400  |
| H | -7.35527700 | 0.27689700  | -1.54515700 | C                            | 3.98924900  | 2.34281700  | 3.32789600  |
| C | -5.05407300 | -0.58494200 | -1.29710600 | H                            | 3.71071500  | 2.97706600  | 4.16369900  |
| C | -4.66486300 | -0.05047100 | -2.53334100 | C                            | 3.00311800  | 1.84950300  | 2.48301800  |
| H | -4.28927800 | 0.96513000  | -2.58708400 | H                            | 1.96055400  | 2.07416700  | 2.67367700  |
| C | -4.74660100 | -0.80829400 | -3.70288900 | C                            | 3.34739600  | 1.01959900  | 1.39780500  |
| H | -4.43308000 | -0.37034500 | -4.64630700 | C                            | 2.53923700  | -0.85184900 | 0.08689300  |
| C | -5.22151800 | -2.11930700 | -3.66225100 | C                            | 3.85616800  | -1.28909900 | -0.11395800 |
| H | -5.28082300 | -2.71089700 | -4.57113500 | C                            | 4.06246300  | -2.62323400 | -0.50459700 |
| C | -5.61710800 | -2.66207700 | -2.43943300 | H                            | 5.06948200  | -2.98272800 | -0.67443000 |
| H | -5.98958900 | -3.68140200 | -2.38939500 | C                            | 1.67476900  | -3.02124200 | -0.50288900 |
| C | -5.53351400 | -1.90264400 | -1.27128800 | H                            | 0.84372000  | -3.69336000 | -0.69013800 |
| H | -5.84357300 | -2.34387000 | -0.33042100 | C                            | 2.97391300  | -3.48022700 | -0.68581400 |

|   |             |             |             |                   |             |             |             |
|---|-------------|-------------|-------------|-------------------|-------------|-------------|-------------|
| H | 3.14909100  | -4.50919100 | -0.98874300 | H                 | -4.29615600 | -0.95163700 | 2.59154000  |
| C | 1.39708000  | -1.68832200 | -0.11495400 | C                 | -4.73039400 | 0.83357200  | 3.70106000  |
| C | 0.00000400  | 0.47496200  | 0.00002800  | H                 | -4.42360000 | 0.39598900  | 4.64684700  |
| C | 1.17000300  | 1.19991400  | 0.28372000  | C                 | -5.18747100 | 2.15114200  | 3.65384500  |
| C | 1.18714800  | 2.61586600  | 0.23233600  | H                 | -5.23901700 | 2.74784200  | 4.55989200  |
| H | 2.11674900  | 3.15626700  | 0.36157000  | C                 | -5.57576500 | 2.69320500  | 2.42865200  |
| C | -0.00001000 | 3.30916200  | 0.00017100  | H                 | -5.93438700 | 3.71729400  | 2.37352000  |
| H | -0.00001600 | 4.39373600  | 0.00022600  | C                 | -5.50380300 | 1.92611600  | 1.26417600  |
| C | -1.17000100 | 1.19993100  | -0.28359000 | H                 | -5.81060900 | 2.36725800  | 0.32211300  |
| C | -1.18716100 | 2.61587700  | -0.23206400 | B                 | 0.00001100  | -1.05832800 | -0.00004800 |
| H | -2.11676800 | 3.15628100  | -0.36124200 | <b>BN-DPAC_T1</b> |             |             |             |
| C | -2.53921900 | -0.85186700 | -0.08696600 | N                 | -2.35878200 | 0.49211800  | -0.55050100 |
| C | -1.39705100 | -1.68834600 | 0.11480700  | N                 | 2.35877300  | 0.49215000  | 0.55043100  |
| C | -1.67472300 | -3.02129900 | 0.50263800  | C                 | 6.36591700  | -0.99073400 | 0.21748800  |
| H | -0.84366600 | -3.69342200 | 0.68983000  | C                 | 6.52253500  | -1.81608300 | 1.34592000  |
| C | -2.97386000 | -3.48030800 | 0.68554600  | H                 | 5.69350600  | -1.93600000 | 2.03643700  |
| H | -3.14902500 | -4.50929400 | 0.98840700  | C                 | 7.71948600  | -2.48399800 | 1.59020300  |
| C | -4.06242100 | -2.62331200 | 0.50440700  | H                 | 7.81225300  | -3.11563100 | 2.46907200  |
| H | -5.06943100 | -2.98282700 | 0.67423900  | C                 | 8.79515300  | -2.34438200 | 0.70807500  |
| C | -3.85614700 | -1.28914800 | 0.11384800  | H                 | 9.72951100  | -2.86512000 | 0.89609800  |
| C | -4.68894300 | 0.63046200  | -1.19779800 | C                 | 8.65395700  | -1.53192900 | -0.41388900 |
| C | -3.34739300 | 1.01970600  | -1.39769000 | H                 | 9.47940500  | -1.41368500 | -1.11004400 |
| C | -3.00312800 | 1.84970600  | -2.48283300 | C                 | 7.44986200  | -0.86109000 | -0.65659400 |
| H | -1.96056800 | 2.07439800  | -2.67347700 | H                 | 7.36292500  | -0.23520400 | -1.53662100 |
| C | -3.98926800 | 2.34307400  | -3.32767200 | C                 | 5.01571500  | -0.26972200 | -0.00368200 |
| H | -3.71074400 | 2.97739300  | -4.16342400 | C                 | 5.04483800  | 0.58997700  | -1.30457400 |
| C | -5.32508500 | 1.99494700  | -3.11583900 | C                 | 5.50909300  | 1.91327500  | -1.28537900 |
| H | -6.10269000 | 2.37428500  | -3.77127100 | H                 | 5.81868700  | 2.36279600  | -0.34823700 |
| C | -5.65954900 | 1.13748500  | -2.06608600 | C                 | 5.57973800  | 2.66920800  | -2.45704400 |
| H | -6.69591300 | 0.85802900  | -1.91665600 | H                 | 5.94054400  | 3.69300200  | -2.41231700 |
| C | -5.00927700 | -0.27086900 | 0.00477700  | C                 | 5.18707500  | 2.11656600  | -3.67614800 |
| C | -6.35926800 | -0.99314100 | -0.21336000 | H                 | 5.23721700  | 2.70478400  | -4.58778000 |
| C | -6.51094900 | -1.83294300 | -1.33179200 | C                 | 4.72729400  | 0.79968700  | -3.70987200 |
| H | -5.67819500 | -1.96271100 | -2.01602300 | H                 | 4.41664900  | 0.35403600  | -4.65059700 |
| C | -7.70759300 | -2.50231800 | -1.57380800 | C                 | 4.65693200  | 0.04578100  | -2.53730300 |
| H | -7.79652800 | -3.14540200 | -2.44474700 | H                 | 4.29327400  | -0.97449600 | -2.58321900 |
| C | -8.78772400 | -2.34983400 | -0.69929300 | C                 | 4.69839800  | 0.64400200  | 1.19056500  |
| H | -9.72178200 | -2.87179200 | -0.88548300 | C                 | 5.67137300  | 1.15773000  | 2.05283300  |
| C | -8.65136000 | -1.52312600 | 0.41285800  | H                 | 6.70793700  | 0.88044200  | 1.90096900  |
| H | -9.48035600 | -1.39478500 | 1.10300300  | C                 | 5.33740400  | 2.01729600  | 3.10060100  |
| C | -7.44755800 | -0.85086700 | 0.65329100  | H                 | 6.11594600  | 2.40254200  | 3.75146100  |
| H | -7.36432800 | -0.21388400 | 1.52570400  | C                 | 4.00119600  | 2.36013400  | 3.31633300  |
| C | -5.04216300 | 0.60215800  | 1.29695800  | H                 | 3.72304100  | 2.99653100  | 4.15058600  |
| C | -4.65804700 | 0.06878900  | 2.53572700  | C                 | 3.01374800  | 1.86160500  | 2.47511900  |

|   |             |             |             |                             |             |             |             |
|---|-------------|-------------|-------------|-----------------------------|-------------|-------------|-------------|
| H | 1.97135700  | 2.08687600  | 2.66519400  | H                           | -7.81172100 | -3.11715600 | -2.46788600 |
| C | 3.35798100  | 1.03056100  | 1.39279000  | C                           | -8.79504400 | -2.34471200 | -0.70764900 |
| C | 2.54292000  | -0.84674500 | 0.09764400  | H                           | -9.72936300 | -2.86556000 | -0.89555400 |
| C | 3.86212500  | -1.28951800 | -0.09966400 | C                           | -8.65410400 | -1.53152700 | 0.41381700  |
| C | 4.06555300  | -2.62230300 | -0.47987900 | H                           | -9.47971500 | -1.41282000 | 1.10969900  |
| H | 5.07143100  | -2.98593800 | -0.64772400 | C                           | -7.45005800 | -0.86054700 | 0.65637100  |
| C | 1.67597100  | -3.01778600 | -0.48523100 | H                           | -7.36331800 | -0.23409400 | 1.53601500  |
| H | 0.84521500  | -3.68956700 | -0.67443200 | C                           | -5.04486100 | 0.59016500  | 1.30448100  |
| C | 2.97296100  | -3.47927900 | -0.66020400 | C                           | -4.65682400 | 0.04614600  | 2.53724800  |
| H | 3.14765000  | -4.50979900 | -0.95806100 | H                           | -4.29305600 | -0.97408700 | 2.58325500  |
| C | 1.39818900  | -1.68304600 | -0.10416400 | C                           | -4.72719200 | 0.80017700  | 3.70973700  |
| C | -0.00000400 | 0.46895800  | -0.00003400 | H                           | -4.41644400 | 0.35466300  | 4.65049200  |
| C | 1.17425600  | 1.20384200  | 0.27648600  | C                           | -5.18711100 | 2.11700400  | 3.67589300  |
| C | 1.18868200  | 2.61419300  | 0.22256700  | H                           | -5.23725800 | 2.70532000  | 4.58746100  |
| H | 2.11857000  | 3.15495900  | 0.35134300  | C                           | -5.57990600 | 2.66946900  | 2.45675100  |
| C | 0.00001200  | 3.31272100  | -0.00018900 | H                           | -5.94082200 | 3.69322000  | 2.41193100  |
| H | 0.00001900  | 4.39678100  | -0.00024900 | C                           | -5.50925600 | 1.91341200  | 1.28516600  |
| C | -1.17425700 | 1.20382500  | -0.27663400 | H                           | -5.81895800 | 2.36279400  | 0.34799300  |
| C | -1.18866600 | 2.61418200  | -0.22286800 | B                           | -0.00001100 | -1.04901600 | 0.00004600  |
| H | -2.11854700 | 3.15494500  | -0.35170400 | <b>DMAC-O_S<sub>0</sub></b> |             |             |             |
| C | -2.54293900 | -0.84672700 | -0.09757500 | N                           | -2.77732000 | -0.40153700 | -0.10441800 |
| C | -1.39821900 | -1.68302200 | 0.10431100  | N                           | 2.08811800  | -0.48220100 | -0.05532700 |
| C | -1.67601800 | -3.01772700 | 0.48549000  | C                           | 0.86430700  | -1.17916000 | -0.06737000 |
| H | -0.84527100 | -3.68950200 | 0.67475000  | C                           | -1.59823600 | -2.54747900 | -0.10966900 |
| C | -2.97301500 | -3.47919400 | 0.66048300  | H                           | -2.52972400 | -3.09467200 | -0.17165400 |
| H | -3.14771800 | -4.50969000 | 0.95841400  | C                           | 1.19630200  | 3.05485200  | 0.69461400  |
| C | -4.06559600 | -2.62222100 | 0.48007800  | H                           | 0.33439400  | 3.71419300  | 0.68806100  |
| H | -5.07148300 | -2.98583200 | 0.64792700  | C                           | -4.02143800 | 1.46354200  | -0.98486900 |
| C | -3.86214700 | -1.28946600 | 0.09977600  | C                           | -4.01067000 | -0.89681200 | 0.41401100  |
| C | -4.69840900 | 0.64392200  | -1.19066000 | C                           | -0.34852000 | -0.44018600 | -0.08391500 |
| C | -3.35798500 | 1.03044900  | -1.39291800 | C                           | -1.63334300 | 1.75217900  | -0.55512300 |
| C | -3.01374000 | 1.86139200  | -2.47532000 | C                           | 3.26724700  | -1.02335200 | -0.65773800 |
| H | -1.97134500 | 2.08663100  | -2.66541500 | C                           | -4.10560500 | -1.84223600 | 1.44245800  |
| C | -4.00118000 | 2.35986900  | -3.31657400 | H                           | -3.20253600 | -2.24208400 | 1.88610500  |
| H | -3.72301600 | 2.99619000  | -4.15088100 | C                           | 2.16598700  | 0.86649600  | 0.36221700  |
| C | -5.33739500 | 2.01708600  | -3.10079900 | C                           | -2.79344300 | 0.94305600  | -0.53630600 |
| H | -6.11593400 | 2.40230300  | -3.75168000 | C                           | 3.41346800  | 1.32843700  | 0.84384600  |
| C | -5.67137800 | 1.15761600  | -2.05295600 | C                           | -1.58350600 | -1.14488600 | -0.08816000 |
| H | -6.70795000 | 0.88038200  | -1.90105500 | C                           | -5.19876800 | -0.33908200 | -0.08184400 |
| C | -5.01573100 | -0.26967900 | 0.00368500  | C                           | -2.97478300 | 3.56616000  | -1.50812700 |
| C | -6.36591400 | -0.99076000 | -0.21737800 | H                           | -3.04565100 | 4.57483000  | -1.90278200 |
| C | -6.52226100 | -1.81687300 | -1.34528800 | C                           | 3.18834500  | -1.84302400 | -1.79251200 |
| H | -5.69305900 | -1.93727700 | -2.03551200 | H                           | 2.21982900  | -2.10598200 | -2.20016800 |
| C | -7.71916200 | -2.48493400 | -1.58941900 | C                           | 4.52002300  | -0.62140300 | -0.15874400 |

|                  |             |             |             |   |             |             |             |
|------------------|-------------|-------------|-------------|---|-------------|-------------|-------------|
| C                | -0.38900100 | -3.23764100 | -0.07151800 | C | -4.03647400 | 1.47749900  | -0.96920000 |
| H                | -0.40478100 | -4.32383300 | -0.07050400 | C | -3.96948600 | -0.87765400 | 0.45635100  |
| C                | 1.03029800  | 1.71330600  | 0.29084400  | C | -0.34560800 | -0.40046300 | -0.07932700 |
| C                | -1.75986700 | 3.06539700  | -1.06469200 | C | -1.63458500 | 1.78932400  | -0.55270900 |
| H                | -0.87152700 | 3.68351300  | -1.13751400 | C | 3.23900700  | -1.00784200 | -0.67928700 |
| C                | 3.52124700  | 2.67293800  | 1.19265400  | C | -4.04370300 | -1.88869900 | 1.43720700  |
| H                | 4.46582900  | 3.05814500  | 1.55948400  | H | -3.12936200 | -2.26782300 | 1.87525900  |
| C                | 5.67189700  | -1.08815100 | -0.80177800 | C | 2.17149100  | 0.88890800  | 0.38710300  |
| H                | 6.64719900  | -0.78788000 | -0.43685100 | C | -2.80693200 | 0.98003700  | -0.53316100 |
| C                | -5.35313300 | -2.28039600 | 1.88924500  | C | 3.41671900  | 1.31473500  | 0.87619400  |
| H                | -5.40174100 | -3.02810500 | 2.67434000  | C | -1.56349600 | -1.11237200 | -0.07275500 |
| C                | 2.42323900  | 3.53915300  | 1.11982500  | C | -5.18482100 | -0.32846800 | -0.02054100 |
| H                | 2.53406900  | 4.57676200  | 1.42011000  | C | -3.03281800 | 3.57592100  | -1.51789100 |
| C                | 0.83857600  | -2.58127000 | -0.03466700 | H | -3.10737700 | 4.58878200  | -1.90253100 |
| H                | 1.75731900  | -3.15149100 | 0.01940300  | C | 3.15217700  | -1.82366400 | -1.82090700 |
| C                | -6.52438700 | -1.75790800 | 1.34091800  | H | 2.18114900  | -2.05277500 | -2.24380900 |
| H                | -7.49498300 | -2.10197000 | 1.68309800  | C | 4.49945800  | -0.63036700 | -0.16903200 |
| C                | -4.12065200 | 2.76079000  | -1.45688400 | C | -0.39689300 | -3.23105100 | -0.13846600 |
| H                | -5.08508700 | 3.11591700  | -1.80440500 | H | -0.41783500 | -4.31537500 | -0.16030700 |
| C                | 4.53673600  | 0.30566200  | 1.05801100  | C | 1.03424600  | 1.74951200  | 0.29324100  |
| C                | -6.44454400 | -0.76551300 | 0.36371300  | C | -1.80043800 | 3.09253500  | -1.06371100 |
| H                | -7.33106800 | -0.30602000 | -0.06003600 | H | -0.93176300 | 3.73955500  | -1.12354500 |
| C                | 5.59723600  | -1.93495500 | -1.90702100 | C | 3.56636200  | 2.66728600  | 1.22103600  |
| H                | 6.50741000  | -2.28944400 | -2.38086900 | H | 4.51773000  | 3.03455800  | 1.58589300  |
| C                | 4.34895300  | -2.30786200 | -2.40428000 | C | 5.64320700  | -1.11478100 | -0.81071700 |
| H                | 4.27251000  | -2.94455300 | -3.28053200 | H | 6.62269600  | -0.83642300 | -0.43940900 |
| C                | 4.21414600  | -0.52785300 | 2.33343200  | C | -5.27408000 | -2.38114600 | 1.85005500  |
| H                | 4.18438500  | 0.12477300  | 3.21194900  | H | -5.30799700 | -3.15808500 | 2.60659100  |
| H                | 4.98676800  | -1.28770500 | 2.49070900  | C | 2.48728800  | 3.55032600  | 1.11102300  |
| H                | 3.24945300  | -1.03383100 | 2.25235800  | H | 2.61901800  | 4.59313200  | 1.38820400  |
| C                | 5.90590000  | 0.97346100  | 1.26397800  | C | 0.82006600  | -2.56255400 | -0.07121700 |
| H                | 6.19914200  | 1.58363100  | 0.40436200  | H | 1.74366800  | -3.12493200 | -0.00601500 |
| H                | 6.67987700  | 0.22018300  | 1.43265000  | C | -6.46403800 | -1.87052600 | 1.31312200  |
| H                | 5.89380200  | 1.61078600  | 2.15182000  | H | -7.42290700 | -2.26213200 | 1.63563900  |
| B                | -0.31351600 | 1.07879800  | -0.11940400 | C | -4.16964200 | 2.77421700  | -1.47323500 |
| O                | -5.15462000 | 0.66868000  | -1.02264900 | H | -5.14492300 | 3.12052600  | -1.79459400 |
| <b>DMAC-O_S1</b> |             |             |             | C | 4.52522800  | 0.27041300  | 1.06687500  |
| N                | -2.76913000 | -0.35938800 | -0.04113300 | C | -6.41692300 | -0.83236600 | 0.38736100  |
| N                | 2.07687500  | -0.46078000 | -0.07951000 | H | -7.31704700 | -0.38809300 | -0.02281000 |
| C                | 0.84833400  | -1.14635700 | -0.09690300 | C | 5.55887400  | -1.95532800 | -1.92185500 |
| C                | -1.59901300 | -2.51412500 | -0.16895800 | H | 6.46543200  | -2.32065400 | -2.39447000 |
| H                | -2.53848000 | -3.04269900 | -0.27025700 | C | 4.30659400  | -2.30607700 | -2.42816700 |
| C                | 1.24929800  | 3.09810600  | 0.67551600  | H | 4.22502900  | -2.93304500 | -3.31097900 |
| H                | 0.41193400  | 3.78851000  | 0.64652800  | C | 4.19472100  | -0.58831800 | 2.32385900  |

|                             |             |             |             |                             |             |             |             |
|-----------------------------|-------------|-------------|-------------|-----------------------------|-------------|-------------|-------------|
| H                           | 4.17067800  | 0.04677600  | 3.21523600  | H                           | -5.31421800 | -3.18551200 | 2.57119800  |
| H                           | 4.95780500  | -1.36106900 | 2.46716200  | C                           | 2.50040300  | 3.55246800  | 1.08521800  |
| H                           | 3.22319600  | -1.07944500 | 2.23177800  | H                           | 2.63388500  | 4.59637000  | 1.35689000  |
| C                           | 5.90464300  | 0.91289500  | 1.28650500  | C                           | 0.80876100  | -2.55638600 | -0.06315500 |
| H                           | 6.20829700  | 1.53303900  | 0.43777700  | H                           | 1.72985000  | -3.12440200 | -0.00619000 |
| H                           | 6.66772500  | 0.14598600  | 1.44505900  | C                           | -6.47112700 | -1.88334400 | 1.29173400  |
| H                           | 5.89729500  | 1.53702100  | 2.18358300  | H                           | -7.42938700 | -2.28002700 | 1.60951200  |
| B                           | -0.30783400 | 1.13317200  | -0.10623100 | C                           | -4.17205700 | 2.78892300  | -1.45372100 |
| O                           | -5.18519600 | 0.70907800  | -0.90734600 | H                           | -5.14630300 | 3.14264700  | -1.76841400 |
| <b>DMAC-O_T<sub>1</sub></b> |             |             |             | C                           | 4.52936800  | 0.26722500  | 1.06896300  |
| N                           | -2.77758600 | -0.35210800 | -0.03998800 | C                           | -6.42588800 | -0.83341200 | 0.38158000  |
| N                           | 2.08010400  | -0.46592000 | -0.06834300 | H                           | -7.32607100 | -0.38217200 | -0.02045200 |
| C                           | 0.84746700  | -1.14881000 | -0.07763600 | C                           | 5.56304800  | -1.96221400 | -1.91678300 |
| C                           | -1.60904000 | -2.50818100 | -0.18377000 | H                           | 6.46911800  | -2.32801700 | -2.39004600 |
| H                           | -2.54974500 | -3.03180000 | -0.30006000 | C                           | 4.31032600  | -2.31115600 | -2.42225800 |
| C                           | 1.26165000  | 3.09726100  | 0.65508400  | H                           | 4.22754600  | -2.93795400 | -3.30515000 |
| H                           | 0.42438900  | 3.78778600  | 0.62468300  | C                           | 4.18941300  | -0.58120900 | 2.32983900  |
| C                           | -4.04369700 | 1.49384100  | -0.94478000 | H                           | 4.16613200  | 0.05927800  | 3.21745300  |
| C                           | -3.97912300 | -0.87904900 | 0.45000000  | H                           | 4.94788600  | -1.35705200 | 2.48034800  |
| C                           | -0.34817800 | -0.39181200 | -0.06551600 | H                           | 3.21575100  | -1.06776500 | 2.23739600  |
| C                           | -1.62438400 | 1.78663400  | -0.54850100 | C                           | 5.91033600  | 0.90532600  | 1.29025000  |
| C                           | 3.24325200  | -1.01664100 | -0.67111500 | H                           | 6.22017300  | 1.51908500  | 0.43908800  |
| C                           | -4.05056800 | -1.90471300 | 1.41566200  | H                           | 6.66950800  | 0.13607000  | 1.45607300  |
| H                           | -3.13564400 | -2.28883500 | 1.84724700  | H                           | 5.90234300  | 1.53489800  | 2.18362300  |
| C                           | 2.17843500  | 0.88686700  | 0.37823800  | B                           | -0.30535200 | 1.13023500  | -0.11043800 |
| C                           | -2.80896500 | 0.98361600  | -0.51944000 | O                           | -5.19333000 | 0.73807300  | -0.87463700 |
| C                           | 3.42622800  | 1.31515000  | 0.86581000  | <b>DMAC-S_S<sub>0</sub></b> |             |             |             |
| C                           | -1.56829900 | -1.10960800 | -0.07188700 | N                           | -2.64322800 | -0.41697000 | -0.16213300 |
| C                           | -5.19248400 | -0.32169900 | -0.01576200 | N                           | 2.23039700  | -0.46929700 | -0.09521600 |
| C                           | -3.02601600 | 3.58035200  | -1.50353000 | C                           | 1.01203700  | -1.17365300 | -0.14927200 |
| H                           | -3.09593700 | 4.59323600  | -1.88969900 | C                           | -1.44760200 | -2.54509900 | -0.23421500 |
| C                           | 3.15593400  | -1.82987800 | -1.81277400 | H                           | -2.38369600 | -3.08695900 | -0.29154600 |
| H                           | 2.18453400  | -2.06330000 | -2.23232100 | C                           | 1.30626200  | 3.00737800  | 0.87621700  |
| C                           | 4.50322400  | -0.64063100 | -0.16235300 | H                           | 0.43814500  | 3.65746300  | 0.91478800  |
| C                           | -0.41269100 | -3.22799700 | -0.15319300 | C                           | -3.87653800 | 1.47575300  | -1.05658800 |
| H                           | -0.43265600 | -4.31133600 | -0.19631200 | C                           | -3.78036000 | -0.93062000 | 0.54232700  |
| C                           | 1.04701100  | 1.74975600  | 0.27949700  | C                           | -0.20334200 | -0.44111000 | -0.13320200 |
| C                           | -1.79434100 | 3.09441500  | -1.05690500 | C                           | -1.50958200 | 1.75840000  | -0.48330600 |
| H                           | -0.92470300 | 3.73902700  | -1.12497700 | C                           | 3.41360900  | -0.96724800 | -0.72539000 |
| C                           | 3.57787000  | 2.66722700  | 1.19794400  | C                           | -3.62971500 | -1.68031700 | 1.71858300  |
| H                           | 4.53002700  | 3.03526100  | 1.56075200  | H                           | -2.63477600 | -1.88537900 | 2.09545600  |
| C                           | 5.64783800  | -1.12359900 | -0.80497300 | C                           | 2.29540500  | 0.85249800  | 0.40265900  |
| H                           | 6.62721200  | -0.84454500 | -0.43376900 | C                           | -2.66938900 | 0.94385400  | -0.55861600 |
| C                           | -5.28002700 | -2.40047200 | 1.82335800  | C                           | 3.53984900  | 1.29592500  | 0.91013300  |

|                           |             |             |             |   |             |             |             |
|---------------------------|-------------|-------------|-------------|---|-------------|-------------|-------------|
| C                         | -1.43293300 | -1.14562700 | -0.17045000 | N | -2.62795600 | -0.36770900 | -0.08799600 |
| C                         | -5.07722600 | -0.62408800 | 0.10289500  | N | 2.21780400  | -0.44169600 | -0.12425400 |
| C                         | -2.81650800 | 3.62558200  | -1.38198400 | C | 0.99442900  | -1.13400100 | -0.17908900 |
| H                         | -2.87463800 | 4.65874700  | -1.70995500 | C | -1.44983500 | -2.50408200 | -0.29487100 |
| C                         | 3.33978900  | -1.72652400 | -1.90171700 | H | -2.39470300 | -3.02470200 | -0.39546900 |
| H                         | 2.37294400  | -1.97492300 | -2.32236400 | C | 1.36840300  | 3.04761000  | 0.88508800  |
| C                         | 4.66337200  | -0.58321500 | -0.20555300 | H | 0.52638400  | 3.73236100  | 0.90777500  |
| C                         | -0.23671100 | -3.23462600 | -0.22937500 | C | -3.87942500 | 1.49618400  | -1.05448600 |
| H                         | -0.24922600 | -4.32020600 | -0.26515400 | C | -3.74314000 | -0.92068700 | 0.56689900  |
| C                         | 1.15134900  | 1.69299200  | 0.38699200  | C | -0.20140800 | -0.39402400 | -0.11635700 |
| C                         | -1.61859000 | 3.09499800  | -0.92365500 | C | -1.50245900 | 1.80307200  | -0.46491700 |
| H                         | -0.72881600 | 3.71572600  | -0.92541300 | C | 3.38056000  | -0.94604300 | -0.75534300 |
| C                         | 3.63575100  | 2.61664000  | 1.34260700  | C | -3.57939900 | -1.77375500 | 1.68100500  |
| H                         | 4.57769800  | 2.98673600  | 1.73102500  | H | -2.58015300 | -1.96826000 | 2.05088100  |
| C                         | 5.81827400  | -1.00533500 | -0.87344300 | C | 2.30546000  | 0.87493300  | 0.43372300  |
| H                         | 6.79156700  | -0.71743500 | -0.49350300 | C | -2.67647200 | 0.98663500  | -0.55364400 |
| C                         | -4.74441700 | -2.17734600 | 2.38949300  | C | 3.54976400  | 1.27217900  | 0.94958100  |
| H                         | -4.60346200 | -2.76940300 | 3.28838600  | C | -1.41442800 | -1.10310000 | -0.14689800 |
| C                         | 2.52953500  | 3.47544800  | 1.32833400  | C | -5.05827500 | -0.60525900 | 0.14965600  |
| H                         | 2.63154100  | 4.49260500  | 1.69438700  | C | -2.85500400 | 3.65217200  | -1.37387700 |
| C                         | 0.98994300  | -2.57595000 | -0.18032400 | H | -2.91917300 | 4.69180700  | -1.68244200 |
| H                         | 1.91061800  | -3.14546200 | -0.15725100 | C | 3.29290400  | -1.69451100 | -1.94297200 |
| C                         | -6.03138800 | -1.90066900 | 1.92344400  | H | 2.32143800  | -1.89991700 | -2.37673600 |
| H                         | -6.90149600 | -2.28380800 | 2.44693000  | C | 4.64091200  | -0.59461800 | -0.22555900 |
| C                         | -3.95260800 | 2.81241500  | -1.43884500 | C | -0.24880800 | -3.21782100 | -0.31050800 |
| H                         | -4.89389600 | 3.20546700  | -1.81074100 | H | -0.26608900 | -4.29997700 | -0.38250500 |
| C                         | 4.67338500  | 0.27316400  | 1.06184500  | C | 1.16300000  | 1.73200400  | 0.40437800  |
| C                         | -6.19450200 | -1.10267800 | 0.79351700  | C | -1.64987800 | 3.14177100  | -0.89120900 |
| H                         | -7.18717000 | -0.84230200 | 0.43978800  | H | -0.78110300 | 3.79093700  | -0.86071300 |
| C                         | 5.74919700  | -1.79223400 | -2.02251300 | C | 3.68975700  | 2.59622400  | 1.39382900  |
| H                         | 6.66170400  | -2.11329600 | -2.51529700 | H | 4.63943500  | 2.94281500  | 1.78239400  |
| C                         | 4.50353700  | -2.14880000 | -2.53794300 | C | 5.78418600  | -1.03677200 | -0.89701800 |
| H                         | 4.43140800  | -2.73886000 | -3.44657800 | H | 6.76386400  | -0.77820800 | -0.51241100 |
| C                         | 4.36128400  | -0.63569000 | 2.28755500  | C | -4.67860000 | -2.34060600 | 2.30749500  |
| H                         | 4.32656300  | -0.03518800 | 3.20231600  | H | -4.52761200 | -2.98896300 | 3.16452300  |
| H                         | 5.14163100  | -1.39562000 | 2.39973200  | C | 2.60486400  | 3.47623800  | 1.35185300  |
| H                         | 3.40152900  | -1.14584100 | 2.17845100  | H | 2.72928000  | 4.49665400  | 1.70490800  |
| C                         | 6.03668800  | 0.94092000  | 1.30405700  | C | 0.97030400  | -2.54840600 | -0.22789600 |
| H                         | 6.32182100  | 1.60340900  | 0.48124500  | H | 1.89539500  | -3.11154100 | -0.20020700 |
| H                         | 6.81814700  | 0.18646000  | 1.42634400  | C | -5.97527300 | -2.05730600 | 1.85779400  |
| H                         | 6.02124500  | 1.52448800  | 2.22806800  | H | -6.83586200 | -2.49656700 | 2.35151900  |
| B                         | -0.18535000 | 1.07585200  | -0.06884200 | C | -3.98026800 | 2.83745500  | -1.46514200 |
| S                         | -5.27249700 | 0.39983500  | -1.33931600 | H | -4.92722700 | 3.22101100  | -1.82878000 |
| <b>DMAC-S<sub>1</sub></b> |             |             |             | C | 4.66686600  | 0.22609800  | 1.06430100  |

|                             |             |             |             |                              |             |             |             |
|-----------------------------|-------------|-------------|-------------|------------------------------|-------------|-------------|-------------|
| C                           | -6.15930100 | -1.17997700 | 0.79468900  | C                            | -1.64871100 | 3.14911200  | -0.87726400 |
| H                           | -7.15950900 | -0.92504100 | 0.45902400  | H                            | -0.77736300 | 3.79507000  | -0.85863900 |
| C                           | 5.69932200  | -1.81027900 | -2.05611500 | C                            | 3.70649700  | 2.60103300  | 1.36419400  |
| H                           | 6.60599500  | -2.14288300 | -2.55197700 | H                            | 4.65659000  | 2.94877400  | 1.75075400  |
| C                           | 4.44729900  | -2.13563500 | -2.58001600 | C                            | 5.78637900  | -1.06509500 | -0.88767600 |
| H                           | 4.36630700  | -2.70916000 | -3.49835300 | H                            | 6.76732700  | -0.81116700 | -0.50339200 |
| C                           | 4.34913300  | -0.71476600 | 2.26507300  | C                            | -4.69046700 | -2.35481100 | 2.29203300  |
| H                           | 4.32562700  | -0.13874500 | 3.19563300  | H                            | -4.54079800 | -3.00345400 | 3.14896400  |
| H                           | 5.11837900  | -1.48943400 | 2.35402600  | C                            | 2.62130300  | 3.48359300  | 1.31986300  |
| H                           | 3.38050800  | -1.20603800 | 2.14632900  | H                            | 2.74883000  | 4.50551200  | 1.66728300  |
| C                           | 6.04340600  | 0.86264900  | 1.31759000  | C                            | 0.96474900  | -2.53782500 | -0.21212800 |
| H                           | 6.33681200  | 1.54032100  | 0.51032700  | H                            | 1.88888000  | -3.10300800 | -0.18473700 |
| H                           | 6.81258700  | 0.09235300  | 1.41956300  | C                            | -5.98473500 | -2.08349000 | 1.82990800  |
| H                           | 6.03847200  | 1.42478400  | 2.25466100  | H                            | -6.84586700 | -2.53266400 | 2.31373800  |
| B                           | -0.18062000 | 1.13618200  | -0.04022100 | C                            | -3.98642700 | 2.84921600  | -1.43256400 |
| S                           | -5.31790400 | 0.46686700  | -1.22795800 | H                            | -4.93242500 | 3.23758400  | -1.79325900 |
| <b>DMAC-S_T<sub>1</sub></b> |             |             |             | C                            | 4.67533800  | 0.22713400  | 1.05816200  |
| N                           | -2.63350000 | -0.35882400 | -0.08278800 | C                            | -6.16762400 | -1.20416900 | 0.76816200  |
| N                           | 2.22126400  | -0.43963500 | -0.12171100 | H                            | -7.16720600 | -0.95546700 | 0.42602200  |
| C                           | 0.99402100  | -1.12924900 | -0.16598700 | C                            | 5.69689000  | -1.84385500 | -2.04252700 |
| C                           | -1.45387100 | -2.49286000 | -0.29202100 | H                            | 6.60163400  | -2.18655900 | -2.53500000 |
| H                           | -2.40000000 | -3.01126900 | -0.39497300 | C                            | 4.44351700  | -2.16082000 | -2.56742900 |
| C                           | 1.38338300  | 3.05486500  | 0.86071000  | H                            | 4.35928100  | -2.73817800 | -3.48298600 |
| H                           | 0.54294900  | 3.74135700  | 0.88388600  | C                            | 4.35242100  | -0.69636700 | 2.27075600  |
| C                           | -3.88964700 | 1.51121800  | -1.02556300 | H                            | 4.33221900  | -0.10851500 | 3.19391700  |
| C                           | -3.75487700 | -0.92478500 | 0.56227900  | H                            | 5.11787000  | -1.47348900 | 2.36924800  |
| C                           | -0.20248100 | -0.37765900 | -0.10890100 | H                            | 3.38145900  | -1.18449700 | 2.15867700  |
| C                           | -1.50029800 | 1.80843200  | -0.45218700 | C                            | 6.05479100  | 0.86041700  | 1.30330800  |
| C                           | 3.38418400  | -0.95632800 | -0.74985200 | H                            | 6.35124400  | 1.52640700  | 0.48750800  |
| C                           | -3.59078600 | -1.77628000 | 1.67498900  | H                            | 6.82026500  | 0.08787700  | 1.41505400  |
| H                           | -2.59248400 | -1.96372500 | 2.05087900  | H                            | 6.05274900  | 1.43423400  | 2.23325800  |
| C                           | 2.31475200  | 0.87882600  | 0.41927600  | B                            | -0.17722800 | 1.13910000  | -0.04289200 |
| C                           | -2.68029700 | 0.99480700  | -0.53121700 | S                            | -5.32186100 | 0.47987400  | -1.22439700 |
| C                           | 3.56355600  | 1.27759500  | 0.93063800  | <b>DMAC-Se_S<sub>0</sub></b> |             |             |             |
| C                           | -1.41945100 | -1.09310600 | -0.14306400 | N                            | -2.30030900 | -0.45557900 | -0.03053900 |
| C                           | -5.06560000 | -0.61648100 | 0.13599800  | N                            | 2.57568000  | -0.46237700 | -0.10799300 |
| C                           | -2.85399400 | 3.66057800  | -1.34936800 | C                            | 1.36230200  | -1.17686800 | -0.14333900 |
| H                           | -2.91745300 | 4.69974800  | -1.66009800 | C                            | -1.08809600 | -2.56703600 | -0.17670400 |
| C                           | 3.29137400  | -1.70826700 | -1.93342400 | H                            | -2.02282400 | -3.11373900 | -0.21007000 |
| H                           | 2.31861200  | -1.91030600 | -2.36557700 | C                            | 1.64941500  | 2.97727700  | 0.98763900  |
| C                           | 4.64491800  | -0.60965600 | -0.22135700 | H                            | 0.77665900  | 3.61676900  | 1.07195100  |
| C                           | -0.25751400 | -3.21125500 | -0.30373900 | C                            | -3.56229100 | 1.44343800  | -0.88145700 |
| H                           | -0.27486900 | -4.29252800 | -0.38109700 | C                            | -3.37390200 | -0.98025200 | 0.76545000  |
| C                           | 1.17372600  | 1.73786100  | 0.38880400  | C                            | 0.14237800  | -0.45574700 | -0.07510800 |



|   |             |             |             |                   |             |             |             |
|---|-------------|-------------|-------------|-------------------|-------------|-------------|-------------|
| C | -1.19488600 | 1.73811500  | -0.32744300 | C                 | 6.41117600  | 0.95087400  | 1.20633400  |
| C | 3.74294800  | -0.93299900 | -0.78654000 | H                 | 6.66267500  | 1.63770900  | 0.39256600  |
| C | -3.10967500 | -1.67122300 | 1.95810100  | H                 | 7.20359800  | 0.20188000  | 1.28310600  |
| H | -2.08298100 | -1.81486500 | 2.27393200  | H                 | 6.42031700  | 1.50976900  | 2.14556700  |
| C | 2.64362300  | 0.84638700  | 0.42272600  | B                 | 0.14730400  | 1.05866000  | 0.03334300  |
| C | -2.34944100 | 0.91455900  | -0.40124100 | Se                | -5.04587800 | 0.26875900  | -1.17148800 |
| C | 3.89939300  | 1.28921200  | 0.90246500  | <b>DMAC-Se_S1</b> |             |             |             |
| C | -1.08163600 | -1.16912100 | -0.09054300 | N                 | -2.27726900 | -0.41052500 | 0.04046800  |
| C | -4.70816900 | -0.76095900 | 0.39888800  | N                 | 2.56685500  | -0.43286400 | -0.13865600 |
| C | -2.53381500 | 3.61439300  | -1.15708300 | C                 | 1.34917100  | -1.13679900 | -0.17772700 |
| H | -2.60762400 | 4.65579500  | -1.45472300 | C                 | -1.08580300 | -2.52685300 | -0.25223000 |
| C | 3.63892700  | -1.66551900 | -1.97747600 | H                 | -2.03006200 | -3.05261600 | -0.33146700 |
| H | 2.66155900  | -1.91384200 | -2.37312000 | C                 | 1.71236700  | 3.01284800  | 1.00827100  |
| C | 5.00494900  | -0.54909000 | -0.29708200 | H                 | 0.86424300  | 3.68671000  | 1.07897300  |
| C | 0.12759400  | -3.24667600 | -0.22419900 | C                 | -3.55971700 | 1.46341100  | -0.88245900 |
| H | 0.12277800  | -4.33152100 | -0.27918200 | C                 | -3.33817300 | -0.99005600 | 0.76513600  |
| C | 1.49154000  | 1.67543300  | 0.46671700  | C                 | 0.14915300  | -0.41052200 | -0.05927900 |
| C | -1.32317900 | 3.08355400  | -0.73219800 | C                 | -1.18354400 | 1.77959900  | -0.30536000 |
| H | -0.43920000 | 3.71257000  | -0.73306000 | C                 | 3.71476400  | -0.90576900 | -0.81848500 |
| C | 3.99622600  | 2.59847000  | 1.36815500  | C                 | -3.06859600 | -1.80218600 | 1.88995300  |
| H | 4.94655800  | 2.96765200  | 1.73645400  | H                 | -2.04098100 | -1.93805400 | 2.20454300  |
| C | 6.14193600  | -0.94371000 | -1.01089600 | C                 | 2.65782800  | 0.86700800  | 0.45756500  |
| H | 7.12408800  | -0.65527600 | -0.65493100 | C                 | -2.35277900 | 0.95360600  | -0.39694200 |
| C | -4.15174200 | -2.18557900 | 2.72500300  | C                 | 3.91311900  | 1.26180800  | 0.94815100  |
| H | -3.92381200 | -2.72936100 | 3.63652200  | C                 | -1.05748000 | -1.12915200 | -0.07374200 |
| C | 2.88187200  | 3.44563600  | 1.41352500  | C                 | -4.68698000 | -0.76092400 | 0.41231300  |
| H | 2.98578000  | 4.45324300  | 1.80459000  | C                 | -2.56637300 | 3.64237800  | -1.13730200 |
| C | 1.35015600  | -2.57838300 | -0.20348200 | H                 | -2.64656800 | 4.69085100  | -1.41044200 |
| H | 2.27562200  | -3.14035700 | -0.22192000 | C                 | 3.59856300  | -1.62151300 | -2.02383200 |
| C | -5.47862100 | -1.98617400 | 2.33718500  | H                 | 2.61638900  | -1.82542600 | -2.43348100 |
| H | -6.29341400 | -2.38068900 | 2.93602000  | C                 | 4.98718200  | -0.55610000 | -0.31691900 |
| C | -3.65994100 | 2.78895700  | -1.22241000 | C                 | 0.12013000  | -3.22824200 | -0.32469900 |
| H | -4.60944200 | 3.18368300  | -1.57111100 | H                 | 0.11053500  | -4.30845600 | -0.42285800 |
| C | 5.04732600  | 0.27508400  | 0.99076400  | C                 | 1.50626200  | 1.71178800  | 0.49061300  |
| C | -5.75241900 | -1.25134100 | 1.18618500  | C                 | -1.35046100 | 3.12966700  | -0.68679200 |
| H | -6.77868900 | -1.05315700 | 0.89313000  | H                 | -0.48741100 | 3.78602100  | -0.64778000 |
| C | 6.04380600  | -1.70400700 | -2.17567200 | C                 | 4.05277300  | 2.57235700  | 1.43111900  |
| H | 6.94319100  | -2.00422100 | -2.70441000 | H                 | 5.01031100  | 2.91711400  | 1.80160400  |
| C | 4.78581100  | -2.06116100 | -2.65978900 | C                 | 6.11381600  | -0.96654000 | -1.03496600 |
| H | 4.69040900  | -2.63072800 | -3.57929100 | H                 | 7.10214000  | -0.70870600 | -0.67265700 |
| C | 4.78409100  | -0.66829900 | 2.20181700  | C                 | -4.09925600 | -2.40027000 | 2.59777200  |
| H | 4.77285700  | -0.09193900 | 3.13257300  | H                 | -3.86677500 | -3.01326500 | 3.46262000  |
| H | 5.57522200  | -1.42237600 | 2.26910100  | C                 | 2.95804600  | 3.44052200  | 1.45141100  |
| H | 3.82647200  | -1.18587400 | 2.11015600  | H                 | 3.08236500  | 4.45024600  | 1.83400500  |

|                              |             |             |             |                              |             |             |             |
|------------------------------|-------------|-------------|-------------|------------------------------|-------------|-------------|-------------|
| C                            | 1.33585400  | -2.54912800 | -0.26432800 | H                            | -2.65837800 | 4.69781600  | -1.37899700 |
| H                            | 2.26621800  | -3.10405000 | -0.28084300 | C                            | 3.58813900  | -1.64931400 | -2.00657700 |
| C                            | -5.43235100 | -2.19211200 | 2.21885100  | H                            | 2.60316700  | -1.84875500 | -2.41123400 |
| H                            | -6.24078800 | -2.65387800 | 2.77623700  | C                            | 4.98908100  | -0.57256000 | -0.31650200 |
| C                            | -3.68124600 | 2.81537800  | -1.24563500 | C                            | 0.11707100  | -3.22473800 | -0.28033100 |
| H                            | -4.63443200 | 3.20088500  | -1.59066100 | H                            | 0.10840700  | -4.30533100 | -0.36722900 |
| C                            | 5.04434900  | 0.22580400  | 0.99577200  | C                            | 1.51434100  | 1.72174800  | 0.47067600  |
| C                            | -5.71844100 | -1.36121500 | 1.14144500  | C                            | -1.35683300 | 3.13963300  | -0.66823800 |
| H                            | -6.74879600 | -1.16765000 | 0.86005200  | H                            | -0.49335400 | 3.79584600  | -0.64043500 |
| C                            | 6.00146700  | -1.70759100 | -2.21279000 | C                            | 4.06972300  | 2.58466600  | 1.39122400  |
| H                            | 6.89592100  | -2.01612500 | -2.74507100 | H                            | 5.02768500  | 2.93239900  | 1.75747300  |
| C                            | 4.73736200  | -2.03170000 | -2.70776500 | C                            | 6.11108000  | -1.00697200 | -1.02765600 |
| H                            | 4.63423200  | -2.57996000 | -3.63922500 | H                            | 7.10230500  | -0.75412800 | -0.67018900 |
| C                            | 4.77412800  | -0.75475800 | 2.17632400  | C                            | -4.11707300 | -2.37455100 | 2.61406600  |
| H                            | 4.77269400  | -0.20745000 | 3.12436000  | H                            | -3.88771500 | -2.97265600 | 3.49007200  |
| H                            | 5.55425200  | -1.52250100 | 2.21816600  | C                            | 2.97335600  | 3.45430300  | 1.40874900  |
| H                            | 3.80780000  | -1.25377000 | 2.07193100  | H                            | 3.10061500  | 4.46667100  | 1.78320700  |
| C                            | 6.42132300  | 0.87020200  | 1.22594000  | C                            | 1.33441500  | -2.53866000 | -0.22424200 |
| H                            | 6.68203100  | 1.57564600  | 0.43135300  | H                            | 2.26552600  | -3.09289300 | -0.23317700 |
| H                            | 7.20145200  | 0.10612100  | 1.28010300  | C                            | -5.44574300 | -2.18651100 | 2.21576600  |
| H                            | 6.43982500  | 1.40322300  | 2.17968800  | H                            | -6.25648300 | -2.64857300 | 2.76977400  |
| B                            | 0.15545800  | 1.11603100  | 0.06543800  | C                            | -3.69241300 | 2.81916600  | -1.21188100 |
| Se                           | -5.08669800 | 0.34026400  | -1.07427400 | H                            | -4.64522700 | 3.20589400  | -1.55649100 |
| <b>DMAC-Se_T<sub>1</sub></b> |             |             |             | C                            | 5.05550500  | 0.23491000  | 0.97994900  |
| N                            | -2.28268000 | -0.40482800 | 0.04230100  | C                            | -5.72787900 | -1.37347600 | 1.12240700  |
| N                            | 2.56853200  | -0.42705600 | -0.13765700 | H                            | -6.75687300 | -1.19178900 | 0.82841800  |
| C                            | 1.34782100  | -1.13008100 | -0.15856000 | C                            | 5.98943100  | -1.76343500 | -2.19465500 |
| C                            | -1.08528300 | -2.51847800 | -0.22063800 | H                            | 6.88030900  | -2.08888200 | -2.72273800 |
| H                            | -2.03019000 | -3.04460400 | -0.29314000 | C                            | 4.72226100  | -2.07993600 | -2.68601500 |
| C                            | 1.72575000  | 3.02588300  | 0.97561800  | H                            | 4.61312600  | -2.63927800 | -3.60998000 |
| H                            | 0.87977000  | 3.70205100  | 1.04618700  | C                            | 4.78802000  | -0.72176400 | 2.18072100  |
| C                            | -3.56936600 | 1.47003000  | -0.86088000 | H                            | 4.79413800  | -0.15627900 | 3.11786200  |
| C                            | -3.35185700 | -0.98941200 | 0.76721800  | H                            | 5.56593500  | -1.49091600 | 2.23251300  |
| C                            | 0.14683900  | -0.39186600 | -0.05078500 | H                            | 3.81954000  | -1.21964900 | 2.09191500  |
| C                            | -1.18554100 | 1.78692500  | -0.29099300 | C                            | 6.43573800  | 0.87936000  | 1.18997100  |
| C                            | 3.71445500  | -0.91931700 | -0.81173800 | H                            | 6.69356600  | 1.56913300  | 0.38089900  |
| C                            | -3.08380400 | -1.77522600 | 1.90684100  | H                            | 7.21379700  | 0.11408900  | 1.25396500  |
| H                            | -2.05789000 | -1.89658500 | 2.23321900  | H                            | 6.46169600  | 1.42949600  | 2.13365100  |
| C                            | 2.66650800  | 0.87621900  | 0.43881900  | B                            | 0.15640300  | 1.12188800  | 0.06084000  |
| C                            | -2.35622500 | 0.95985400  | -0.37743600 | Se                           | -5.07682400 | 0.32526400  | -1.10029900 |
| C                            | 3.92755700  | 1.27388100  | 0.92034000  | <b>BN-O-Se_S<sub>0</sub></b> |             |             |             |
| C                            | -1.06294800 | -1.11836600 | -0.06142400 | N                            | -1.95779800 | -0.46971000 | -0.02949000 |
| C                            | -4.69367000 | -0.77589000 | 0.39594800  | N                            | 2.91490700  | -0.41438400 | 0.06951200  |
| C                            | -2.57419400 | 3.64926000  | -1.10677900 | C                            | 1.71777200  | -1.14864700 | 0.00183300  |

|   |             |             |             |                   |             |             |             |
|---|-------------|-------------|-------------|-------------------|-------------|-------------|-------------|
| C | -0.71556800 | -2.56321800 | -0.12600900 | C                 | 5.49993500  | -2.21106500 | -1.98622600 |
| H | -1.64200300 | -3.11970600 | -0.19949600 | H                 | 5.55211200  | -2.92027500 | -2.80598300 |
| C | 1.90453100  | 3.00360300  | 1.20326300  | B                 | 0.45910700  | 1.07726400  | 0.14559400  |
| H | 1.01802400  | 3.62123300  | 1.30066800  | Se                | -4.66141700 | 0.22453500  | -1.28399800 |
| C | -3.21322500 | 1.41979300  | -0.91179900 | O                 | 5.28974700  | 0.59651800  | 1.06158100  |
| C | -3.05796200 | -1.01735300 | 0.71479000  | <b>BN-O-Se_S1</b> |             |             |             |
| C | 0.48723400  | -0.43628200 | 0.01887300  | N                 | -1.94543300 | -0.44708300 | 0.00784000  |
| C | -0.87779000 | 1.74256900  | -0.25112500 | N                 | 2.90776800  | -0.37117800 | 0.00952100  |
| C | 4.15140000  | -0.89141100 | -0.45951000 | C                 | 1.69700400  | -1.11846400 | -0.00332000 |
| C | -2.83631200 | -1.71027900 | 1.91483300  | C                 | -0.70008300 | -2.54834500 | -0.07358900 |
| H | -1.82280300 | -1.83926600 | 2.27624500  | H                 | -1.63155700 | -3.09609100 | -0.15622900 |
| C | 2.93326900  | 0.90504900  | 0.57141100  | C                 | 1.95162100  | 3.02496700  | 1.21452700  |
| C | -2.01403900 | 0.90320700  | -0.38639200 | H                 | 1.08532100  | 3.67206700  | 1.30377800  |
| C | 4.16037300  | 1.39669300  | 1.05495100  | C                 | -3.20438300 | 1.40741500  | -0.95682000 |
| C | -0.72799600 | -1.16505300 | -0.04363300 | C                 | -3.03717000 | -0.99795800 | 0.73750900  |
| C | -4.37756400 | -0.81577600 | 0.29010800  | C                 | 0.48345300  | -0.39918400 | 0.03139400  |
| C | -2.20985700 | 3.61208700  | -1.10381600 | C                 | -0.87355800 | 1.77694300  | -0.25186100 |
| H | -2.28886500 | 4.65758100  | -1.38521000 | C                 | 4.10838200  | -0.87181100 | -0.50410500 |
| C | 4.25061100  | -1.78698300 | -1.53115300 | C                 | -2.81726800 | -1.70232800 | 1.93568600  |
| H | 3.34976200  | -2.15866700 | -2.00297300 | H                 | -1.80555800 | -1.80799400 | 2.31013400  |
| C | 5.33730400  | -0.36551300 | 0.07422400  | C                 | 2.95022200  | 0.94022900  | 0.57174000  |
| C | 0.50695400  | -3.23063500 | -0.10984100 | C                 | -2.01293900 | 0.92283300  | -0.41290000 |
| H | 0.51543300  | -4.31595200 | -0.15280800 | C                 | 4.18015200  | 1.40723600  | 1.04086800  |
| C | 1.77645200  | 1.71838100  | 0.62653100  | C                 | -0.71323300 | -1.13485500 | 0.00283100  |
| C | -1.01009100 | 3.09368300  | -0.63522200 | C                 | -4.36031600 | -0.81189000 | 0.30066100  |
| H | -0.13750000 | 3.73656300  | -0.58402900 | C                 | -2.26640800 | 3.62517600  | -1.09471400 |
| C | 4.26076800  | 2.66711400  | 1.59447100  | H                 | -2.36764800 | 4.67702700  | -1.34827100 |
| H | 5.22409000  | 2.99905800  | 1.96703500  | C                 | 4.18322300  | -1.83547100 | -1.53145800 |
| C | 6.58498700  | -0.77815100 | -0.37883800 | H                 | 3.26974900  | -2.18815100 | -1.99270100 |
| H | 7.46992700  | -0.34523000 | 0.07506200  | C                 | 5.32412000  | -0.35377800 | 0.00583100  |
| C | -3.90335600 | -2.24560100 | 2.63136700  | C                 | 0.51088100  | -3.22816000 | -0.03283900 |
| H | -3.70792200 | -2.79060800 | 3.54963300  | H                 | 0.52434700  | -4.31257800 | -0.05447300 |
| C | 3.11829000  | 3.47489600  | 1.67967000  | C                 | 1.78411900  | 1.75414200  | 0.63170100  |
| H | 3.19151300  | 4.46151000  | 2.12608700  | C                 | -1.05930400 | 3.13824500  | -0.60905100 |
| C | 1.72106300  | -2.55104500 | -0.04034200 | H                 | -0.21374300 | 3.81401400  | -0.52590200 |
| H | 2.64805100  | -3.10774300 | 0.00201800  | C                 | 4.31585100  | 2.67317500  | 1.61785000  |
| C | -5.21443600 | -2.06547500 | 2.18478700  | H                 | 5.29125700  | 2.99553300  | 1.96302400  |
| H | -6.04884600 | -2.47645500 | 2.74421100  | C                 | 6.55623900  | -0.84465300 | -0.41795800 |
| C | -3.31758900 | 2.76926000  | -1.23475000 | H                 | 7.45609100  | -0.42579200 | 0.01862400  |
| H | -4.25691000 | 3.15490700  | -1.61925700 | C                 | -3.88149100 | -2.25586500 | 2.63954000  |
| C | -5.44812800 | -1.32781400 | 1.02684200  | H                 | -3.68749000 | -2.80071000 | 3.55827200  |
| H | -6.46327300 | -1.14331400 | 0.68958500  | C                 | 3.18409100  | 3.47715100  | 1.70230100  |
| C | 6.66857500  | -1.72293300 | -1.40178500 | H                 | 3.26139900  | 4.46639100  | 2.14332900  |
| H | 7.64050300  | -2.05622300 | -1.75070700 | C                 | 1.71972000  | -2.52217600 | 0.02723100  |

|                   |             |             |             |       |             |             |             |
|-------------------|-------------|-------------|-------------|-------|-------------|-------------|-------------|
| H                 | 2.65431000  | -3.06349000 | 0.10411700  | C     | 4.31244100  | 2.69768000  | 1.59319700  |
| C                 | -5.19206600 | -2.08790000 | 2.18312700  | H     | 5.28659300  | 3.03048100  | 1.93003900  |
| H                 | -6.02583400 | -2.51096200 | 2.73451100  | C     | 6.56478200  | -0.84110800 | -0.40676600 |
| C                 | -3.35161500 | 2.76384800  | -1.27730800 | H     | 7.46397900  | -0.41174100 | 0.02043600  |
| H                 | -4.29620600 | 3.12932400  | -1.66539300 | C     | -3.87107600 | -2.22559100 | 2.65983000  |
| C                 | -5.42654100 | -1.34608800 | 1.02746000  | H     | -3.67179300 | -2.75684000 | 3.58547900  |
| H                 | -6.44195000 | -1.17743000 | 0.68251700  | C     | 3.17010200  | 3.48854000  | 1.67827000  |
| C                 | 6.60316600  | -1.83682000 | -1.39228500 | H     | 3.24055500  | 4.47975100  | 2.11670900  |
| H                 | 7.56167200  | -2.21813100 | -1.72781700 | C     | 1.73219500  | -2.51739000 | 0.04855100  |
| C                 | 5.41338800  | -2.31410000 | -1.96019100 | H     | 2.66841900  | -3.05254300 | 0.14719700  |
| H                 | 5.44779400  | -3.05378800 | -2.75311000 | C     | -5.18394400 | -2.06324300 | 2.20974400  |
| B                 | 0.45416600  | 1.13163600  | 0.14285100  | H     | -6.01475900 | -2.47629700 | 2.77317600  |
| Se                | -4.65032800 | 0.19507300  | -1.29010700 | C     | -3.37040000 | 2.75692800  | -1.25904500 |
| O                 | 5.32580800  | 0.64110300  | 0.94028800  | H     | -4.31696700 | 3.12201800  | -1.64354900 |
| <b>BN-O-Se_T1</b> |             |             |             | C     | -5.42417100 | -1.34089900 | 1.04290800  |
| N                 | -1.95035800 | -0.45856400 | -0.01896400 | H     | -6.44113300 | -1.17447700 | 0.70136800  |
| N                 | 2.91526200  | -0.36210700 | 0.00942600  | C     | 6.61092100  | -1.85012300 | -1.36082000 |
| C                 | 1.70089700  | -1.11653900 | -0.00535600 | H     | 7.56924000  | -2.23734900 | -1.68966200 |
| C                 | -0.68550100 | -2.54550800 | -0.08408800 | C     | 5.42052100  | -2.33845200 | -1.92247200 |
| H                 | -1.61394500 | -3.10055000 | -0.15763700 | H     | 5.45694700  | -3.09002600 | -2.70371900 |
| C                 | 1.93841200  | 3.03009400  | 1.19886000  | B     | 0.44880400  | 1.12728100  | 0.13958000  |
| H                 | 1.07093700  | 3.67458100  | 1.29268000  | Se    | -4.64864100 | 0.17259100  | -1.30011200 |
| C                 | -3.21864000 | 1.40181700  | -0.95192700 | O     | 5.33099200  | 0.68175400  | 0.90440000  |
| C                 | -3.03614400 | -1.00391000 | 0.73178100  | <hr/> |             |             |             |
| C                 | 0.48520100  | -0.39196000 | 0.00954900  |       |             |             |             |
| C                 | -0.89187800 | 1.77431700  | -0.24692300 |       |             |             |             |
| C                 | 4.11707800  | -0.87178700 | -0.49415800 |       |             |             |             |
| C                 | -2.80943700 | -1.68575900 | 1.93946700  |       |             |             |             |
| H                 | -1.79516300 | -1.79221300 | 2.30680800  |       |             |             |             |
| C                 | 2.94832500  | 0.94666000  | 0.55700500  |       |             |             |             |
| C                 | -2.02216300 | 0.91730900  | -0.41243300 |       |             |             |             |
| C                 | 4.18255200  | 1.43103800  | 1.01363700  |       |             |             |             |
| C                 | -0.71225100 | -1.13999400 | -0.02671300 |       |             |             |             |
| C                 | -4.35990400 | -0.82400700 | 0.30084300  |       |             |             |             |
| C                 | -2.28729800 | 3.62156000  | -1.07901700 |       |             |             |             |
| H                 | -2.39160500 | 4.67371700  | -1.32955600 |       |             |             |             |
| C                 | 4.19070700  | -1.85653600 | -1.50205700 |       |             |             |             |
| H                 | 3.27738200  | -2.21767300 | -1.95596900 |       |             |             |             |
| C                 | 5.33033900  | -0.34067300 | 0.00297600  |       |             |             |             |
| C                 | 0.52989500  | -3.22761100 | -0.01184900 |       |             |             |             |
| H                 | 0.54352800  | -4.31190600 | -0.00643100 |       |             |             |             |
| C                 | 1.76695600  | 1.75184700  | 0.62288700  |       |             |             |             |
| C                 | -1.07735200 | 3.13298600  | -0.60080700 |       |             |             |             |
| H                 | -0.23172300 | 3.80911000  | -0.52039100 |       |             |             |             |
